# Supplementary material
Source: publisher figshare collection journal article supplement (https://future-science-group.figshare.com/ndownloader/files/30875182)
Supplement: Supplementary file 1 [file 30875182]

## Sheet: Sheet1
Tissue type / Cell line	Platform	Database	Sample	Number of samples
Fetal Muscle	450K	GEO	GSE56515	9
Fetal Amnion	450K	GEO	GSE56515	8
Fetal Pancreas	450K	GEO	GSE56515	9
Fetal Adrenal Glands	450K	GEO	GSE56515	8
Fetal Brain	450K	GEO	GSE54719	2
Fetal Large Intestine	450K	ArrayExpress	E-MTAB-3703	3
Fetal Small Intestine	450K	ArrayExpress	E-MTAB-3703	3
Fetal Muscle	WGBS	GEO	GSM1172596	1
Fetal Brain	WGBS	GEO	GSM941747	1
Fetal Large Intestine	WGBS	GEO	GSM1097763	1
Fetal Small Intestine	WGBS	GEO	GSM1097764	1
H1 Cell Line	WGBS	Roadmap Epigenomics	E003	1
HUES64 Cell Line	WGBS	Roadmap Epigenomics	E016	1
ES-UCSF4 Cell Line	WGBS	Roadmap Epigenomics	E024	1
H1 Cell Line BMP4 Derived Mesendoderm Cultured Cells	WGBS	Roadmap Epigenomics	E004	1
H1 Cell Line BMP4 Derived Trophoblast Cultured Cells	WGBS	Roadmap Epigenomics	E005	1
H1 Cell Line Derived Mesenchymal Stem Cells	WGBS	Roadmap Epigenomics	E006	1
H1 Cell Line Derived Neuronal Progenitor Cultured Cells	WGBS	Roadmap Epigenomics	E007	1
hESC Derived CD184+ Endoderm Cultured Cells	WGBS	Roadmap Epigenomics	E011	1
hESC Derived CD56+ Ectoderm Cultured Cells	WGBS	Roadmap Epigenomics	E012	1
hESC Derived CD56+ Mesoderm Cultured Cells	WGBS	Roadmap Epigenomics	E013	1
Fetal Intestine Large	WGBS	Roadmap Epigenomics	E084	1
Fetal Intestine Small	WGBS	Roadmap Epigenomics	E085	1
H1 Cell Line	RNA seq	Roadmap Epigenomics	E003	1
HUES64 Cell Line	RNA seq	Roadmap Epigenomics	E016	1
ES-UCSF4 Cell Line	RNA seq	Roadmap Epigenomics	E024	1
H1 Cell Line BMP4 Derived Mesendoderm Cultured Cells	RNA seq	Roadmap Epigenomics	E004	1
H1 Cell Line BMP4 Derived Trophoblast Cultured Cells	RNA seq	Roadmap Epigenomics	E005	1
H1 Cell Line Derived Mesenchymal Stem Cells	RNA seq	Roadmap Epigenomics	E006	1
H1 Cell Line Derived Neuronal Progenitor Cultured Cells	RNA seq	Roadmap Epigenomics	E007	1
hESC Derived CD184+ Endoderm Cultured Cells	RNA seq	Roadmap Epigenomics	E011	1
hESC Derived CD56+ Ectoderm Cultured Cells	RNA seq	Roadmap Epigenomics	E012	1
hESC Derived CD56+ Mesoderm Cultured Cells	RNA seq	Roadmap Epigenomics	E013	1
Fetal Intestine Large	RNA seq	Roadmap Epigenomics	E084	1
Fetal Intestine Small	RNA seq	Roadmap Epigenomics	E085	1
H1 Cell Line	Dnase-seq	Roadmap Epigenomics	E003	1
H9 Cell Line	Dnase-seq	Roadmap Epigenomics	E008	1
H1 Cell Line_BMP4_Derived_Mesendoderm_Cultured_Cells	Dnase-seq	Roadmap Epigenomics	E004	1
H1 Cell Line_BMP4_Derived_Trophoblast_Cultured_Cells	Dnase-seq	Roadmap Epigenomics	E005	1
H1 Cell Line_Derived_Mesenchymal_Stem_Cells	Dnase-seq	Roadmap Epigenomics	E006	1
H1 Cell Line_Derived_Neuronal_Progenitor_Cultured_Cells	Dnase-seq	Roadmap Epigenomics	E007	1
Fetal_Intestine_Large	Dnase-seq	Roadmap Epigenomics	E084	1
Fetal_Intestine_Small	Dnase-seq	Roadmap Epigenomics	E085	1
H1 Cell Line	ChIP-Seq of H2A.Z	Roadmap Epigenomics	E003	1
H9 Cell Line	ChIP-Seq of H2A.Z	Roadmap Epigenomics	E008	1
H1 Cell Line_BMP4_Derived_Trophoblast_Cultured_Cells	ChIP-Seq of H2A.Z	Roadmap Epigenomics	E005	1
H1 Cell Line_Derived_Mesenchymal_Stem_Cells	ChIP-Seq of H2A.Z	Roadmap Epigenomics	E006	1
H1 Cell Line	ChIP-Seq of H3K4me1	Roadmap Epigenomics	E003	1
HUES64 Cell Line	ChIP-Seq of H3K4me1	Roadmap Epigenomics	E016	1
ES-UCSF4 Cell Line	ChIP-Seq of H3K4me1	Roadmap Epigenomics	E024	1
H9 Cell Line	ChIP-Seq of H3K4me1	Roadmap Epigenomics	E008	1
H1 Cell Line_BMP4_Derived_Mesendoderm_Cultured_Cells	ChIP-Seq of H3K4me1	Roadmap Epigenomics	E004	1
H1 Cell Line_BMP4_Derived_Trophoblast_Cultured_Cells	ChIP-Seq of H3K4me1	Roadmap Epigenomics	E005	1
H1 Cell Line_Derived_Mesenchymal_Stem_Cells	ChIP-Seq of H3K4me1	Roadmap Epigenomics	E006	1
H1 Cell Line_Derived_Neuronal_Progenitor_Cultured_Cells	ChIP-Seq of H3K4me1	Roadmap Epigenomics	E007	1
hESC_Derived_CD184+_Endoderm_Cultured_Cells	ChIP-Seq of H3K4me1	Roadmap Epigenomics	E011	1
hESC_Derived_CD56+_Ectoderm_Cultured_Cells	ChIP-Seq of H3K4me1	Roadmap Epigenomics	E012	1
hESC_Derived_CD56+_Mesoderm_Cultured_Cells	ChIP-Seq of H3K4me1	Roadmap Epigenomics	E013	1
Fetal_Intestine_Large	ChIP-Seq of H3K4me1	Roadmap Epigenomics	E084	1
Fetal_Intestine_Small	ChIP-Seq of H3K4me1	Roadmap Epigenomics	E085	1
H1 Cell Line	ChIP-Seq of H3K4me2	Roadmap Epigenomics	E003	1
H9 Cell Line	ChIP-Seq of H3K4me2	Roadmap Epigenomics	E008	1
H1 Cell Line_BMP4_Derived_Mesendoderm_Cultured_Cells	ChIP-Seq of H3K4me2	Roadmap Epigenomics	E004	1
H1 Cell Line_BMP4_Derived_Trophoblast_Cultured_Cells	ChIP-Seq of H3K4me2	Roadmap Epigenomics	E005	1
H1 Cell Line_Derived_Mesenchymal_Stem_Cells	ChIP-Seq of H3K4me2	Roadmap Epigenomics	E006	1
H1 Cell Line_Derived_Neuronal_Progenitor_Cultured_Cells	ChIP-Seq of H3K4me2	Roadmap Epigenomics	E007	1
H1 Cell Line	ChIP-Seq of H3K4me3	Roadmap Epigenomics	E003	1
HUES64 Cell Line	ChIP-Seq of H3K4me3	Roadmap Epigenomics	E016	1
ES-UCSF4 Cell Line	ChIP-Seq of H3K4me3	Roadmap Epigenomics	E024	1
H9 Cell Line	ChIP-Seq of H3K4me3	Roadmap Epigenomics	E008	1
H1 Cell Line_BMP4_Derived_Mesendoderm_Cultured_Cells	ChIP-Seq of H3K4me3	Roadmap Epigenomics	E004	1
H1 Cell Line_BMP4_Derived_Trophoblast_Cultured_Cells	ChIP-Seq of H3K4me3	Roadmap Epigenomics	E005	1
H1 Cell Line_Derived_Mesenchymal_Stem_Cells	ChIP-Seq of H3K4me3	Roadmap Epigenomics	E006	1
H1 Cell Line_Derived_Neuronal_Progenitor_Cultured_Cells	ChIP-Seq of H3K4me3	Roadmap Epigenomics	E007	1
hESC_Derived_CD184+_Endoderm_Cultured_Cells	ChIP-Seq of H3K4me3	Roadmap Epigenomics	E011	1
hESC_Derived_CD56+_Ectoderm_Cultured_Cells	ChIP-Seq of H3K4me3	Roadmap Epigenomics	E012	1
hESC_Derived_CD56+_Mesoderm_Cultured_Cells	ChIP-Seq of H3K4me3	Roadmap Epigenomics	E013	1
Fetal_Intestine_Large	ChIP-Seq of H3K4me3	Roadmap Epigenomics	E084	1
Fetal_Intestine_Small	ChIP-Seq of H3K4me3	Roadmap Epigenomics	E085	1
H1 Cell Line	ChIP-Seq of H3K9ac	Roadmap Epigenomics	E003	1
HUES64 Cell Line	ChIP-Seq of H3K9ac	Roadmap Epigenomics	E016	1
H9 Cell Line	ChIP-Seq of H3K9ac	Roadmap Epigenomics	E008	1
H1 Cell Line_BMP4_Derived_Mesendoderm_Cultured_Cells	ChIP-Seq of H3K9ac	Roadmap Epigenomics	E004	1
H1 Cell Line_BMP4_Derived_Trophoblast_Cultured_Cells	ChIP-Seq of H3K9ac	Roadmap Epigenomics	E005	1
H1 Cell Line_Derived_Mesenchymal_Stem_Cells	ChIP-Seq of H3K9ac	Roadmap Epigenomics	E006	1
H1 Cell Line_Derived_Neuronal_Progenitor_Cultured_Cells	ChIP-Seq of H3K9ac	Roadmap Epigenomics	E007	1
hESC_Derived_CD184+_Endoderm_Cultured_Cells	ChIP-Seq of H3K9ac	Roadmap Epigenomics	E011	1
H1 Cell Line	ChIP-Seq of H3K9me3	Roadmap Epigenomics	E003	1
HUES64 Cell Line	ChIP-Seq of H3K9me3	Roadmap Epigenomics	E016	1
ES-UCSF4 Cell Line	ChIP-Seq of H3K9me3	Roadmap Epigenomics	E024	1
H9 Cell Line	ChIP-Seq of H3K9me3	Roadmap Epigenomics	E008	1
H1 Cell Line_BMP4_Derived_Mesendoderm_Cultured_Cells	ChIP-Seq of H3K9me3	Roadmap Epigenomics	E004	1
H1 Cell Line_BMP4_Derived_Trophoblast_Cultured_Cells	ChIP-Seq of H3K9me3	Roadmap Epigenomics	E005	1
H1 Cell Line_Derived_Mesenchymal_Stem_Cells	ChIP-Seq of H3K9me3	Roadmap Epigenomics	E006	1
H1 Cell Line_Derived_Neuronal_Progenitor_Cultured_Cells	ChIP-Seq of H3K9me3	Roadmap Epigenomics	E007	1
hESC_Derived_CD184+_Endoderm_Cultured_Cells	ChIP-Seq of H3K9me3	Roadmap Epigenomics	E011	1
hESC_Derived_CD56+_Ectoderm_Cultured_Cells	ChIP-Seq of H3K9me3	Roadmap Epigenomics	E012	1
hESC_Derived_CD56+_Mesoderm_Cultured_Cells	ChIP-Seq of H3K9me3	Roadmap Epigenomics	E013	1
Fetal_Intestine_Large	ChIP-Seq of H3K9me3	Roadmap Epigenomics	E084	1
Fetal_Intestine_Small	ChIP-Seq of H3K9me3	Roadmap Epigenomics	E085	1
H1 Cell Line	ChIP-Seq of H3K27ac	Roadmap Epigenomics	E003	1
HUES64 Cell Line	ChIP-Seq of H3K27ac	Roadmap Epigenomics	E016	1
H9 Cell Line	ChIP-Seq of H3K27ac	Roadmap Epigenomics	E008	1
H1 Cell Line_BMP4_Derived_Mesendoderm_Cultured_Cells	ChIP-Seq of H3K27ac	Roadmap Epigenomics	E004	1
H1 Cell Line_BMP4_Derived_Trophoblast_Cultured_Cells	ChIP-Seq of H3K27ac	Roadmap Epigenomics	E005	1
H1 Cell Line_Derived_Mesenchymal_Stem_Cells	ChIP-Seq of H3K27ac	Roadmap Epigenomics	E006	1
H1 Cell Line_Derived_Neuronal_Progenitor_Cultured_Cells	ChIP-Seq of H3K27ac	Roadmap Epigenomics	E007	1
hESC_Derived_CD184+_Endoderm_Cultured_Cells	ChIP-Seq of H3K27ac	Roadmap Epigenomics	E011	1
hESC_Derived_CD56+_Ectoderm_Cultured_Cells	ChIP-Seq of H3K27ac	Roadmap Epigenomics	E012	1
hESC_Derived_CD56+_Mesoderm_Cultured_Cells	ChIP-Seq of H3K27ac	Roadmap Epigenomics	E013	1
Fetal_Intestine_Large	ChIP-Seq of H3K27ac	Roadmap Epigenomics	E084	1
Fetal_Intestine_Small	ChIP-Seq of H3K27ac	Roadmap Epigenomics	E085	1
